# Supplementary material for: Application of machine learning techniques to understand ethnic differences and risk factors for incident chronic kidney disease in Asians
Source: HighWire-hosted journal article supplement (doi:10.1136/bmjdrc-2021-002364), 2021-12-01
Supplement: bmjdrc-2021-002364supp001_data_supplement.pdf [file bmjdrc-2021-002364supp001_data_supplement.pdf]

**eTable1.** Sociodemographic and clinical characteristics at baseline and follow up by ethnicity

|                                    | At baseline (n=5580) |                    |                     |          | At follow-up (n=5336)** |                    |                     |          |
|------------------------------------|----------------------|--------------------|---------------------|----------|-------------------------|--------------------|---------------------|----------|
|                                    | Chinese<br>(n=2234)  | Malays<br>(n=1474) | Indians<br>(n=1872) | P-value* | Chinese<br>(n=2118)     | Malays<br>(n=1406) | Indians<br>(n=1812) | P-value* |
| Age, year                          | 57.4 (8.6)           | 55.2 (9.4)         | 55.4 (8.6)          | < 0.001  | 62.9 (8.5)              | 61.3 (9.3)         | 61.3 (8.5)          | < 0.001  |
| Gender, Male, N (%)                | 1089 (48.7)          | 667 (45.3)         | 946 (50.5)          | 0.009    | 1028 (48.5)             | 635 (45.2)         | 920 (50.8)          | 0.007    |
| Secondary/above education, N (%)   | 1178 (52.7)          | 552 (37.4)         | 939 (50.2)          | < 0.001  | 1201 (56.7)             | 490 (34.9)         | 972 (53.6)          | < 0.001  |
| Diabetes mellitus, N (%)           | 335 (15)             | 376 (25.5)         | 627(33.5)           | < 0.001  | 370 (17.5)              | 422 (30)           | 737 (40.7)          | < 0.001  |
| Hypertension, N (%)                | 1198 (53.6)          | 892 (60.5)         | 996 (53.2)          | < 0.001  | 1347 (63.6)             | 976 (69.6)         | 1184 (65.3)         | 0.002    |
| Current smoking, N (%)             | 288 (12.9)           | 288 (19.5)         | 260 (13.9)          | < 0.001  | 227 (10.7)              | 248 (17.6)         | 229 (12.6)          | < 0.001  |
| Dyslipidemia, N (%)                | 976 (43.7)           | 552 (37.4)         | 828 (44.2)          | < 0.001  | 1195 (56.4)             | 786 (55.9)         | 1130 (62.4)         | < 0.001  |
| Cardiovascular disease, N (%)      | 111 (5)              | 101 (6.9)          | 197 (10.5)          | < 0.001  | 116 (5.5)               | 106 (7.5)          | 232 (12.8)          | < 0.001  |
| Obesity, N (%)                     | 700 (31.3)           | 879 (59.6)         | 1066 (56.9)         | < 0.001  | 689 (32.5)              | 883 (62.8)         | 1070 (59.1)         | < 0.001  |
| Body mass index, kg/m <sup>2</sup> | 23.7 (3.6)           | 26.5 (4.9)         | 26.2 (4.4)          | < 0.001  | 23.7 (3.7)              | 26.9 (5.1)         | 26.4 (4.5)          | < 0.001  |
| Blood glucose, mmol/L              | 6.2 (2.4)            | 6.4 (3.4)          | 6.9 (3.2)           | < 0.001  | 6.3 (2.6)               | 6.9 (3.3)          | 7.3 (3.5)           | < 0.001  |
| HbA1c, %                           | 6 (0.8)              | 6.3 (1.5)          | 6.3 (1.3)           | < 0.001  | 5.8 (0.9)               | 6.3 (1.4)          | 6.4 (1.4)           | < 0.001  |
| Diabetes control^, N (%)           | 159 (47.6)           | 137 (36.4)         | 293 (47.3)          | 0.001    | 181 (48.9)              | 169 (40.1)         | 292 (39.6)          | 0.008    |

|                                                      |             |             |             |         |             |             |             |         |
|------------------------------------------------------|-------------|-------------|-------------|---------|-------------|-------------|-------------|---------|
| Anti-diabetic medication use <sup>^</sup> , N (%)    | 195 (58.2)  | 191 (50.8)  | 411 (65.8)  | <0.001  | 241 (65.8)  | 270 (64.0)  | 519 (70.4)  | 0.058   |
| Systolic blood pressure, mm Hg                       | 134 (18)    | 142 (22)    | 133 (19)    | < 0.001 | 139 (21)    | 140 (20)    | 135 (18)    | < 0.001 |
| Diastolic blood pressure, mm Hg                      | 78 (10)     | 79 (11)     | 78 (10)     | 0.003   | 76 (10)     | 77 (10)     | 77 (9)      | < 0.001 |
| Pulse pressure, mm Hg                                | 56.5 (14.6) | 62.9 (16.7) | 55.2 (14.9) | < 0.001 | 63.6 (16.6) | 62.2 (15.9) | 57.9 (14.8) | < 0.001 |
| Blood pressure control <sup>†</sup> , N (%)          | 351 (29.3)  | 145 (16.3)  | 323 (32.4)  | <0.001  | 377 (28.0)  | 294 (30.1)  | 488 (41.2)  | <0.001  |
| Antihypertensive medication use <sup>†</sup> , N (%) | 654 (54.6)  | 343 (38.5)  | 603 (60.5)  | < 0.001 | 784 (58.2)  | 531 (54.4)  | 772 (65.2)  | < 0.001 |
| ACE inhibitor/ARB <sup>†</sup> , N (%)               | 271 (22.6)  | 86 (9.6)    | 303 (30.4)  | <0.001  | 364 (27.0)  | 298 (30.5)  | 428 (36.1)  | <0.001  |
| Total cholesterol, mmol/L                            | 5.5 (1.0)   | 5.6 (1.1)   | 5.2 (1.1)   | < 0.001 | 5.5 (1.1)   | 5.5 (1.3)   | 5.2 (1.2)   | < 0.001 |
| HDL cholesterol, mmol/L                              | 1.3 (0.4)   | 1.4 (0.3)   | 1.1 (0.3)   | < 0.001 | 1.4 (0.4)   | 1.3 (0.3)   | 1.2 (0.3)   | < 0.001 |
| Estimated GFR, mL/min/1.73 m <sup>2</sup>            | 92.8 (13.5) | 82.9 (14.1) | 91.5 (13.4) | < 0.001 | 87.6 (14.8) | 85.6 (18.3) | 87.7 (15.0) | 0.038   |

Abbreviations: GFR, glomerular filtration rate

Data presented were frequency (percentage) or means (standard deviation)

\*p-value represents difference in characteristics by ethnicity based on Kruskal-Wallis rank sum test or Chi-square test as appropriate for the variable.

<sup>^</sup>Among those with diabetes. Diabetes control data at baseline and at follow up were missing in 8 and 1 participants, respectively. Anti-diabetic medication data were missing in 2 participants at baseline and 4 participants at follow-up.

<sup>†</sup>Among those with self-reported hypertension

\*\*Removed 244 participants at follow-up for missing dyslipidemia (n=193), body mass index (41), hypertension (5), or smoking status (5).

**eTable 2.** Annual incidence of CKD

| Ethnicity | Sample Size | Incident CKD | Crude Cumulative Incidence (%) | Crude Annual* Incidence (%) | Age-standardized Cumulative Incidence (%) | Age-standardized Annual* Incidence (%) | Follow-up Period, Median Years (Interquartile range) |
|-----------|-------------|--------------|--------------------------------|-----------------------------|-------------------------------------------|----------------------------------------|------------------------------------------------------|
| Chinese   | 2234        | 137          | 6.13 (5.15-7.25)               | 1.05 (0.88-1.24)            | 5.38 (4.51-6.4)                           | 0.91 (0.76-1.08)                       | 6.01 (5.26-6.51)                                     |
| Malays    | 1474        | 148          | 10.04 (8.49-11.79)             | 1.52 (1.29-1.79)            | 8.6 (7.26-10.15)                          | 1.28 (1.08-1.51)                       | 6.65 (5.68-7.29)                                     |
| Indians   | 1872        | 108          | 5.77 (4.73-6.97)               | 0.96 (0.79-1.16)            | 4.86 (3.96-5.94)                          | 0.81 (0.66-0.99)                       | 5.94 (5.54-6.56)                                     |
| Total     | 5580        | 393          | 7.04 (6.36-7.77)               | 1.15 (1.04-1.27)            | 6.54 (5.9-7.23)                           | 1.06 (0.96-1.18)                       | 6.10 (5.52-6.71)                                     |

\* Annual incidence = Number of new cases / summed person-years

**eTable 3.** Multivariable OR (95% CI) of the predictors of incident CKD by ethnicity (n=5580), including SBP vs. excluding SBP

|                                                         | <b>Chinese, n = 2234</b>            |                  | <b>Malays, n = 1474</b>              |                   | <b>Indians, n = 1872</b>            |                  |
|---------------------------------------------------------|-------------------------------------|------------------|--------------------------------------|-------------------|-------------------------------------|------------------|
|                                                         | <b>Incident CKD, n = 137 (6.1%)</b> |                  | <b>Incident CKD, n = 148 (10.0%)</b> |                   | <b>Incident CKD, n = 108 (5.8%)</b> |                  |
| Variable                                                | Included SBP                        | Excluded SBP     | Included SBP                         | Excluded SBP      | Included SBP                        | Excluded SBP     |
| Age, per 10 years increase                              | 1.68 (1.26-2.25)                    | 1.79 (1.35-2.38) | 1.95 (1.53-2.49)                     | 2.06 (1.62-2.62)  | 1.75 (1.28-2.38)                    | 1.87 (1.38-2.53) |
| Gender, Male vs. Female                                 | 1.12 (0.68-1.82)                    | 1.11 (0.68-1.81) | 1.00 (0.64-1.56)                     | 0.95 (0.61-1.47)  | 0.68 (0.41-1.14)                    | 0.62 (0.37-1.02) |
| Secondary and above education vs. primary and below     | 0.78 (0.49-1.22)                    | 0.77 (0.49-1.21) | 1.05 (0.64-1.71)                     | 1.01 (0.62-1.64)  | 0.84 (0.50-1.39)                    | 0.8 (0.49-1.33)  |
| Current smoking, Yes vs. No                             | 1.11 (0.60-2.07)                    | 1.07 (0.57-2.00) | 1.45 (0.82-2.54)                     | 1.44 (0.82-2.51)  | 1.60 (0.73-3.51)                    | 1.6 (0.74-3.49)  |
| Diabetes, Yes vs. No                                    | 4.56 (2.84-7.31)                    | 4.41 (2.76-7.04) | 3.32 (2.23-4.93)                     | 3.31 (2.23-4.89)  | 3.65 (2.20-6.05)                    | 3.64 (2.21-6.00) |
| Hypertension, Yes vs. No                                | 1.26 (0.65-2.42)                    | 1.73 (0.97-3.08) | 3.13 (1.49-6.57)                     | 5.11 (2.58-10.13) | 1.41 (0.68-2.92)                    | 2.3 (1.19-4.43)  |
| Dyslipidemia, Yes vs. No                                | 0.84 (0.53-1.32)                    | 0.83 (0.53-1.31) | 0.77 (0.51-1.15)                     | 0.78 (0.52-1.16)  | 0.94 (0.56-1.56)                    | 0.92 (0.56-1.52) |
| Systolic blood pressure, per SD increase                | 1.31 (1.02-1.69)                    | -                | 1.46 (1.18-1.81)                     | -                 | 1.55 (1.20-2.00)                    | -                |
| Estimated glomerular filtration rate, per unit decrease | 1.13 (1.10-1.15)                    | 1.12 (1.10-1.15) | 1.05 (1.03-1.07)                     | 1.05 (1.03-1.07)  | 1.12 (1.10-1.15)                    | 1.12 (1.09-1.15) |
| Obesity, Yes vs. No                                     | 1.38 (0.89-2.16)                    | 1.39 (0.89-2.17) | 1.30 (0.86-1.97)                     | 1.22 (0.81-1.84)  | 0.85 (0.52-1.40)                    | 0.85 (0.52-1.38) |
| Cardiovascular disease, Yes vs. No                      | 1.54 (0.80-2.96)                    | 1.41 (0.74-2.72) | 2.26 (1.22-4.17)                     | 1.92 (1.05-3.51)  | 1.35 (0.74-2.45)                    | 1.18 (0.66-2.12) |

SD, standard deviation; SBP, systolic blood pressure

**eTable 4.** Multivariable predictors of percentage reduction in estimated glomerular filtration rate by ethnicity (n=5580)

| Variable                                            | Chinese, n = 2234                         |                                       | Malays, n = 1474                           |                                       | Indians, n = 1872                         |                                       |
|-----------------------------------------------------|-------------------------------------------|---------------------------------------|--------------------------------------------|---------------------------------------|-------------------------------------------|---------------------------------------|
|                                                     | Incident CKD, n = 137 (6.1%)              |                                       | Incident CKD, n = 148 (10.0%)              |                                       | Incident CKD, n = 108 (5.8%)              |                                       |
|                                                     | Age, sex-adjusted<br>Coefficient (95% CI) | Multivariable<br>Coefficient (95% CI) | Age, sex- adjusted<br>Coefficient (95% CI) | Multivariable<br>Coefficient (95% CI) | Age, sex-adjusted<br>Coefficient (95% CI) | Multivariable<br>Coefficient (95% CI) |
| Age, per 10 years increase                          | 2.03 (1.45, 2.61)                         | 3.5 (2.77, 4.22)                      | 7.12 (5.95, 8.29)                          | 8.70 (7.47, 9.93)                     | 3.07 (2.41, 3.73)                         | 4.58 (3.80, 5.37)                     |
| Gender, Male vs. Female                             | -0.1 (-1.09, 0.90)                        | 1.94 (0.86, 3.02)                     | 0.55 (-1.65, 2.76)                         | 5.74 (3.49, 7.99)                     | -1.84 (-2.98, -0.71)                      | -0.27 (-1.48, 0.94)                   |
| Secondary and above education vs. primary and below | -0.62 (-1.66, 0.41)                       | 0.16 (-0.84, 1.16)                    | -1.69 (-4.13, 0.75)                        | -0.33 (-2.44, 1.78)                   | -0.31 (-1.49, 0.86)                       | 0.37 (-0.75, 1.49)                    |
| Current smoking, Yes vs. No                         | 0.23 (-1.36, 1.81)                        | -0.17 (-1.68, 1.34)                   | 1.89 (-1.26, 5.04)                         | 1.96 (-0.78, 4.69)                    | 0.45 (-1.32, 2.22)                        | 0.48 (-1.21, 2.16)                    |
| Diabetes, Yes vs. No                                | 6.69 (5.30, 8.08)                         | 5.84 (4.46, 7.22)                     | 10.65 (8.15, 13.15)                        | 7.82 (5.55, 10.08)                    | 3.46 (2.24, 4.68)                         | 2.54 (1.34, 3.74)                     |
| Hypertension, Yes vs. No                            | 1.45 (0.38, 2.52)                         | 0.26 (-1.03, 1.55)                    | 3.59 (1.17, 6.00)                          | 0.41 (-2.25, 3.08)                    | 1.00 (-0.22, 2.22)                        | -1.48 (-2.92, -0.05)                  |
| Dyslipidemia, Yes vs. No                            | 0.89 (-0.14, 1.92)                        | 0.38 (-0.62, 1.39)                    | -0.20 (-2.51, 2.11)                        | -0.58 (-2.59, 1.43)                   | 0.75 (-0.44, 1.93)                        | 0.6 (-0.54, 1.75)                     |

|                                                         |                     |                     |                      |                     |                      |                      |
|---------------------------------------------------------|---------------------|---------------------|----------------------|---------------------|----------------------|----------------------|
| Systolic blood pressure, per SD increase                | 0.81 (0.27, 1.35)   | 0.7 (0.07, 1.34)    | 2.68 (1.50, 3.87)    | 2.78 (1.50, 4.06)   | 1.38 (0.79, 1.98)    | 1.73 (1.05, 2.41)    |
| Estimated glomerular filtration rate, per unit decrease | -0.3 (-0.34, -0.25) | -0.3 (-0.34, -0.25) | -0.79 (-0.86, -0.71) | -0.77 (-0.84, -0.7) | -0.34 (-0.39, -0.30) | -0.33 (-0.38, -0.29) |
| Obesity, Yes vs. No                                     | 0.55 (-0.53, 1.63)  | -0.06 (-1.11, 1.00) | 0.8 (-1.45, 3.06)    | -0.36 (-2.36, 1.65) | -0.42 (-1.57, 0.74)  | -0.5 (-1.62, 0.62)   |
| Cardiovascular disease, Yes vs. No                      | 4.52 (2.19, 6.85)   | 4.19 (1.94, 6.44)   | 4.45 (0.10, 8.81)    | 4.04 (0.27, 7.81)   | 2.38 (0.48, 4.28)    | 2.19 (0.34, 4.05)    |

Abbreviations: SD, standard deviation

Multivariable model adjusted for age, gender, education, current smoking, diabetes, dyslipidemia, systolic blood pressure, obesity and cardiovascular disease.

A) Multivariate Logistic Regression

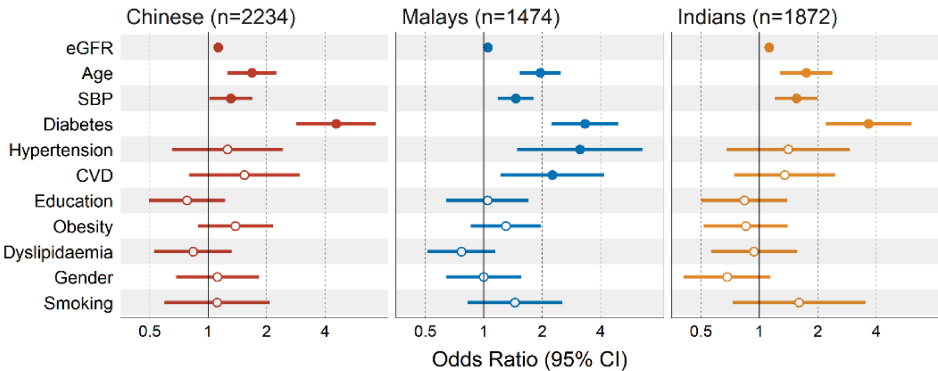

**eFigure 1.** Variables associated with incident CKD in each ethnic group, analysed by (A) Logistic Regression (LR), (B) Gradient Boosted Machine and (C) Random Forest. The odds ratio for estimated glomerular filtration rate refers to per unit decrease.

B) Gradient Boosting Machine

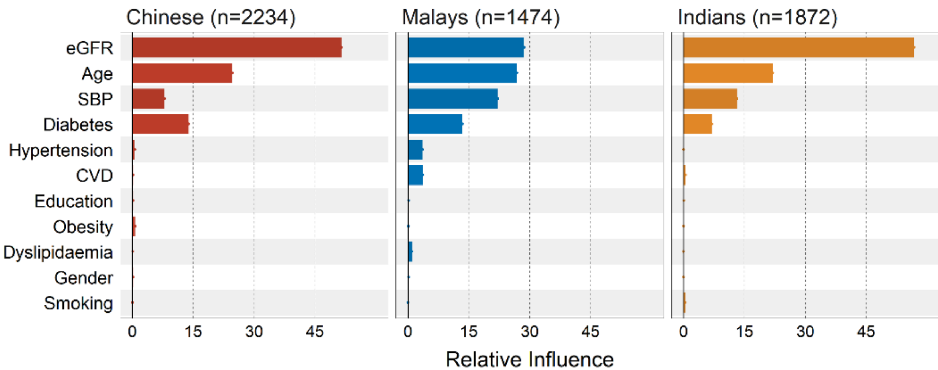

C) Random Forest

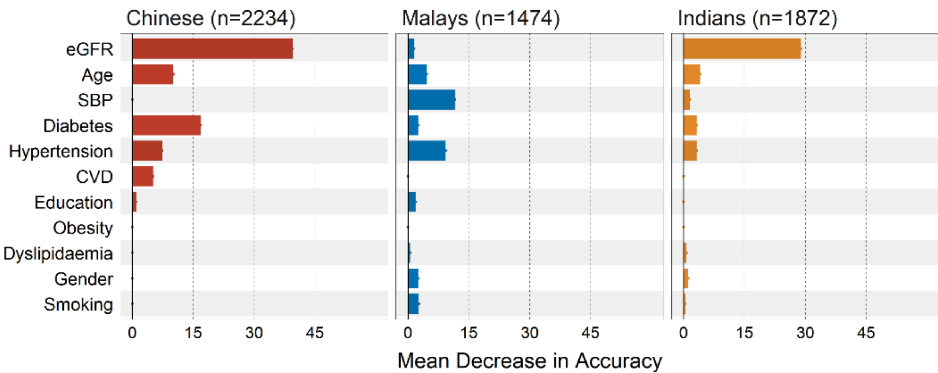



**eTable 5.** Population attributable risks\* for incident chronic kidney disease in the multivariate model

$$\text{PAR\%} = \frac{\text{Prevalence} \times (\text{Relative Risk} - 1) \times 100}{[\text{Prevalence} \times (\text{Relative Risk} - 1) + 1]}$$
, Relative Risk replaced by odds Ratio

|                        | PAR using crude prevalence |        |         | PAR using age-standardized prevalence |        |         |
|------------------------|----------------------------|--------|---------|---------------------------------------|--------|---------|
|                        | Chinese                    | Malays | Indians | Chinese                               | Malays | Indians |
| Diabetes               | 34.8                       | 37.2   | 47      | 33.2                                  | 35.4   | 45.2    |
| Hypertension           |                            | 56.3   |         |                                       | 54.7   |         |
| Cardiovascular Disease |                            | 7.9    |         |                                       | 7.5    |         |

\* For binary risk factors that were significant in the multivariable model i.e. diabetes in Chinese and Indians and diabetes, hypertension and cardiovascular disease in Malays.

**eTable 6.** Multivariable predictors of incident CKD by ethnicity in 1338 participants with diabetes

|                                                         | Multivariable OR (95% CI)                |                                          |                                          |
|---------------------------------------------------------|------------------------------------------|------------------------------------------|------------------------------------------|
|                                                         | Chinese with diabetes, n = 277           | Malays with diabetes, n = 298            | Indians with diabetes, n = 555           |
|                                                         | Incident diabetic CKD, n = 58<br>(17.3%) | Incident diabetic CKD, n = 78<br>(20.7%) | Incident diabetic CKD, n = 72<br>(11.5%) |
| Age, per 10 years increase                              | 1.39 (0.81-2.39)                         | 1.93 (1.29-2.89)                         | 1.38 (0.91-2.11)                         |
| Gender, Male vs. Female                                 | 0.81 (0.34-1.92)                         | 0.65 (0.33-1.29)                         | 0.62 (0.32-1.21)                         |
| Secondary and above education vs. primary and below     | 0.70 (0.31-1.60)                         | 0.91 (0.43-1.91)                         | 0.90 (0.46-1.74)                         |
| Current smoking, Yes vs. No                             | 1.01 (0.33-3.13)                         | 1.39 (0.56-3.46)                         | 0.64 (0.17-2.42)                         |
| Hypertension, Yes vs. No                                | 0.74 (0.20-2.67)                         | 9.31 (1.92-45.23)                        | 2.21 (0.72-6.74)                         |
| Dyslipidemia, Yes vs. No                                | 0.61 (0.26-1.41)                         | 0.62 (0.34-1.13)                         | 1.33 (0.65-2.7)                          |
| Systolic blood pressure, per SD increase                | 1.52 (0.97-2.39)                         | 1.57 (1.15-2.14)                         | 1.53 (1.09-2.13)                         |
| Estimated glomerular filtration rate, per unit decrease | 1.13 (1.09-1.17)                         | 1.03 (1.01-1.06)                         | 1.11 (1.08-1.15)                         |
| Obesity, Yes vs. No                                     | 1.57 (0.69-3.53)                         | 1.52 (0.77-3.03)                         | 0.64 (0.33-1.26)                         |
| Cardiovascular disease, Yes vs. No                      | 0.92 (0.3-2.84)                          | 1.28 (0.52-3.16)                         | 1.57 (0.76-3.23)                         |
| HbA1c %, per SD increase                                | 1.30 (0.89-1.91)                         | 1.75 (1.30-2.37)                         | 1.46 (1.05-2.03)                         |

|                                             |                  |                  |                  |
|---------------------------------------------|------------------|------------------|------------------|
| Duration of diabetes, per 10 years increase | 1.50 (0.98-2.31) | 1.66 (1.08-2.54) | 1.14 (0.81-1.62) |
|---------------------------------------------|------------------|------------------|------------------|

Abbreviations: SD, standard deviation

**eTable 7.** Baseline characteristics of participants without CKD who attended the follow up visit compared with those who did not attend

|                                    | Attended follow-up | Did not attend follow-up | P-value |
|------------------------------------|--------------------|--------------------------|---------|
|                                    | (n = 5945)         | (n = 2437)               |         |
| Age, year                          | 56.4 (9)           | 59.7 (11.2)              | <0.001  |
| Gender, Male, N (%)                | 2851 (48)          | 1248 (51.2)              | 0.007   |
| Ethnicity, N (%)                   |                    |                          | <0.001  |
| Chinese                            | 2427 (40.8)        | 540 (22.2)               |         |
| Malays                             | 1517 (25.5)        | 912 (37.4)               |         |
| Indians                            | 2001 (33.7)        | 985 (40.4)               |         |
| Secondary/above education, N (%)   | 2788 (46.9)        | 800 (32.9)               | <0.001  |
| Diabetes mellitus, N (%)           | 1455 (24.5)        | 810 (33.2)               | <0.001  |
| Hypertension, N (%)                | 3340 (56.3)        | 1634 (67.2)              | <0.001  |
| Current smoking, N (%)             | 879 (14.8)         | 516 (21.2)               | <0.001  |
| Dyslipidemia, N (%)                | 2530 (42.7)        | 1016 (42.3)              | 0.750   |
| Cardiovascular disease, N (%)      | 445 (7.5)          | 293 (12)                 | <0.001  |
| Obesity, N (%)                     | 2798 (47.1)        | 1195 (49.5)              | 0.054   |
| Body mass index, kg/m <sup>2</sup> | 25.3 (4.4)         | 25.5 (5.2)               | 0.209   |

|                                                      |              |              |        |
|------------------------------------------------------|--------------|--------------|--------|
| Blood glucose, mmol/L                                | 6.5 (3)      | 7 (3.8)      | <0.001 |
| HbA1c, %                                             | 6.2 (1.2)    | 6.4 (1.5)    | <0.001 |
| Diabetes control <sup>^</sup> , N (%)                | 636 (44)     | 324 (40.3)   | 0.096  |
| Anti-diabetic medication use <sup>^</sup> , N (%)    | 865 (59.5)   | 444 (54.8)   | 0.036  |
| Systolic blood pressure, mm Hg                       | 136.2 (19.9) | 142.7 (22.6) | <0.001 |
| Diastolic blood pressure, mm Hg                      | 78.1 (10.2)  | 79.1 (10.9)  | 0.009  |
| Pulse pressure, mm Hg                                | 58.1 (15.7)  | 63.6 (18.1)  | <0.001 |
| Blood pressure control <sup>†</sup> , N (%)          | 891 (26.7)   | 333 (20.4)   | <0.001 |
| Antihypertensive medication use <sup>†</sup> , N (%) | 1749 (52.4)  | 764 (46.8)   | <0.001 |
| ACE inhibitor/ARB <sup>†</sup> , N (%)               | 721 (21.6)   | 326 (20)     | 0.196  |
| Total cholesterol, mmol/L                            | 5.4 (1.1)    | 5.4 (1.2)    | 0.608  |
| HDL cholesterol, mmol/L                              | 1.2 (0.4)    | 1.2 (0.4)    | 0.951  |
| Estimated GFR, mL/min/1.73 m <sup>2</sup>            | 89.7 (14.3)  | 86.5 (15.2)  | <0.001 |

---

GFR, glomerular filtration rate

Data presented are mean (standard deviation) or frequency (%), where appropriate

\*p-value represents difference in characteristics by ethnicity based on Kruskal-Wallis rank sum test or Chi-square test where appropriate and denotes attending participants vs those who did not attend follow-up exam.

<sup>^</sup>Among those with diabetes.

---

†Among those with self-reported hypertension

**eTable 8.** Population attributable risks\* for incident chronic kidney disease in the multivariate model

$$PAR\% = Pr(\text{exposure} | \text{incident CKD}) \left(1 - \frac{1}{RR}\right) \times 100$$

$$PAR\% = \left(1 - \frac{E}{O}\right) \times 100$$

Pr(exposure| incident CKD): proportion of incident CKD cases exposed to the risk factor.

Relative risk is approximated by the adjusted odds ratio under the rare disease assumption.

*E*: The number of incident CKD cases predicted by multivariable logistic regression model when the exposure is set to absent.

*O*: The number of incident CKD cases observed

|                        | Chinese | Malays | Indians | Chinese | Malays | Indians |
|------------------------|---------|--------|---------|---------|--------|---------|
| Diabetes               | 33.0    | 36.8   | 48.4    | 25.8    | 30.6   | 38.6    |
| Hypertension           |         | 63.4   |         |         | 54.8   |         |
| Cardiovascular Disease |         | 7.5    |         |         | 5.7    |         |

\* For binary risk factors that were significant in the multivariable model i.e. diabetes in Chinese and Indians and diabetes, hypertension and cardiovascular disease in Malays.
